# Supplementary material
Source: PubMed Central journal article supplement (PMC3734530)
Supplement: NIHMS494321-supplement-Supplementary_Fig.pdf [file NIHMS494321-supplement-Supplementary_Fig.pdf]

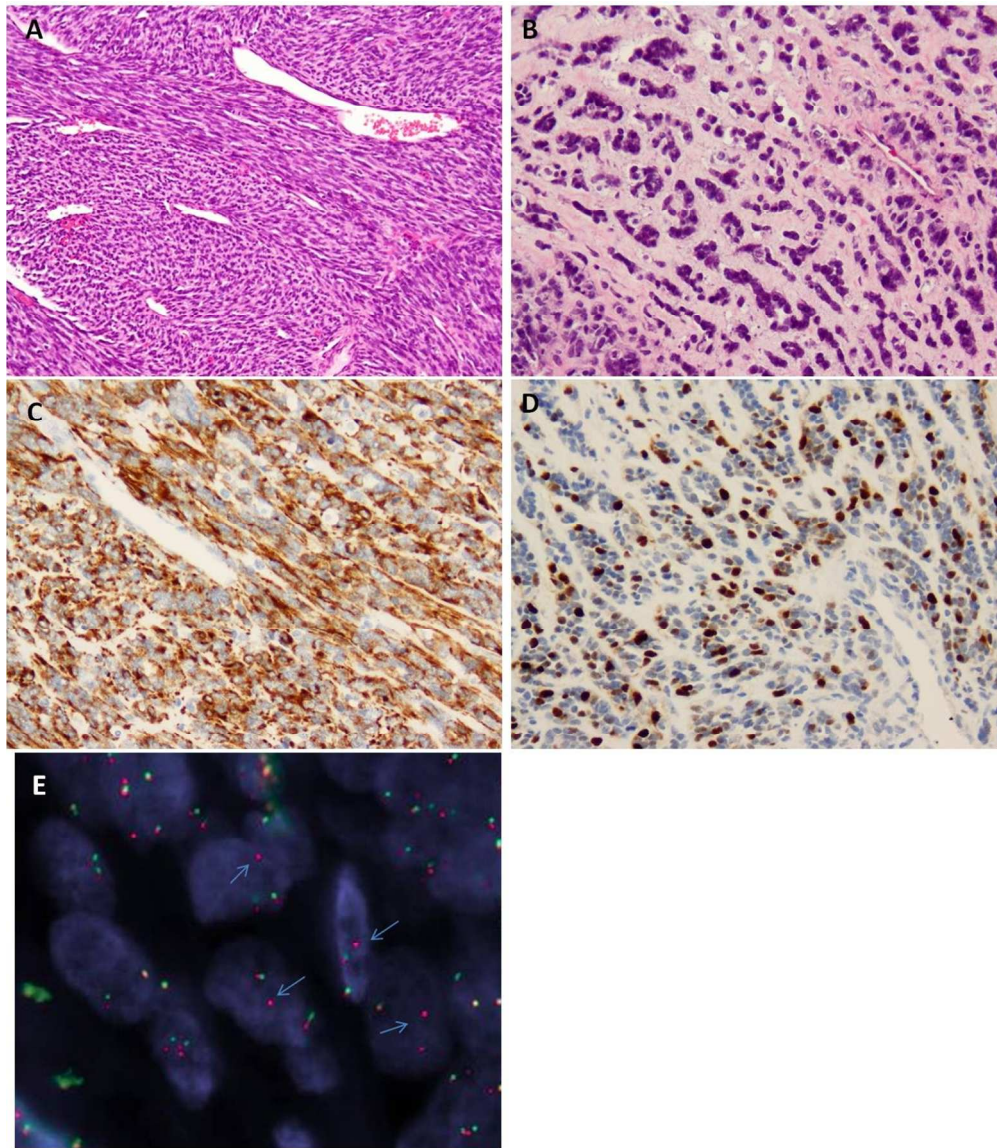

45  
46  
47  
48  
49  
50  
51  
52  
53  
54  
55  
56  
57  
58  
59  
60

Supplementary Figure 1. Spindle cell rhabdomyosarcomas with NCOA2 gene rearrangement. Tumor from a 3-month old child who presented with a chest wall mass (case RMS5). (A) It is composed of spindle cells that form intersecting long fascicles. (B) Four years later and after treatment, local recurrence of tumor demonstrates predominantly sclerosing morphology with focal solid areas resembling solid variant ARMS. (A,B original magnification 100x). Immunohistochemistry shows diffuse reactivity for desmin (C) and focal for myogenin (D). (E) FISH demonstrates unbalanced NCOA2 break-apart signals, single red signals showing loss of telomeric parts of NCOA2. No gene partner was identified in this case. 226x260mm (150 x 150 DPI)
